# Supplementary material
Source: Springer Nature journal article supplement (https://www.springermedizin.de/resource/supplementary/12967_2011_818_MOESM3_ESM.pdf/9577112)

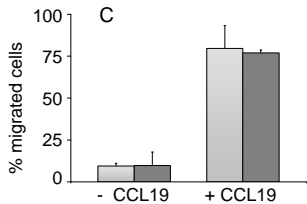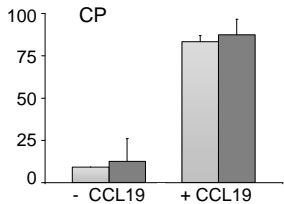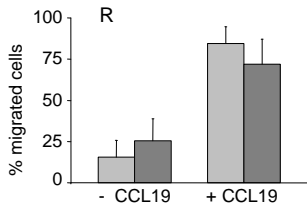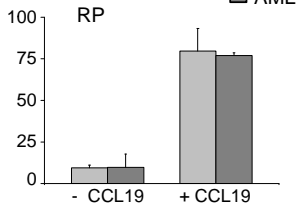

HC  
AML

Supplement: MOESM3 [file 9577112]
